# Supplementary material
Source: PubMed Central journal article supplement (PMC3187621)
Supplement: NIHMS36571-supplement-1.pdf [file NIHMS36571-supplement-1.pdf]

# Supplementary Figure 1

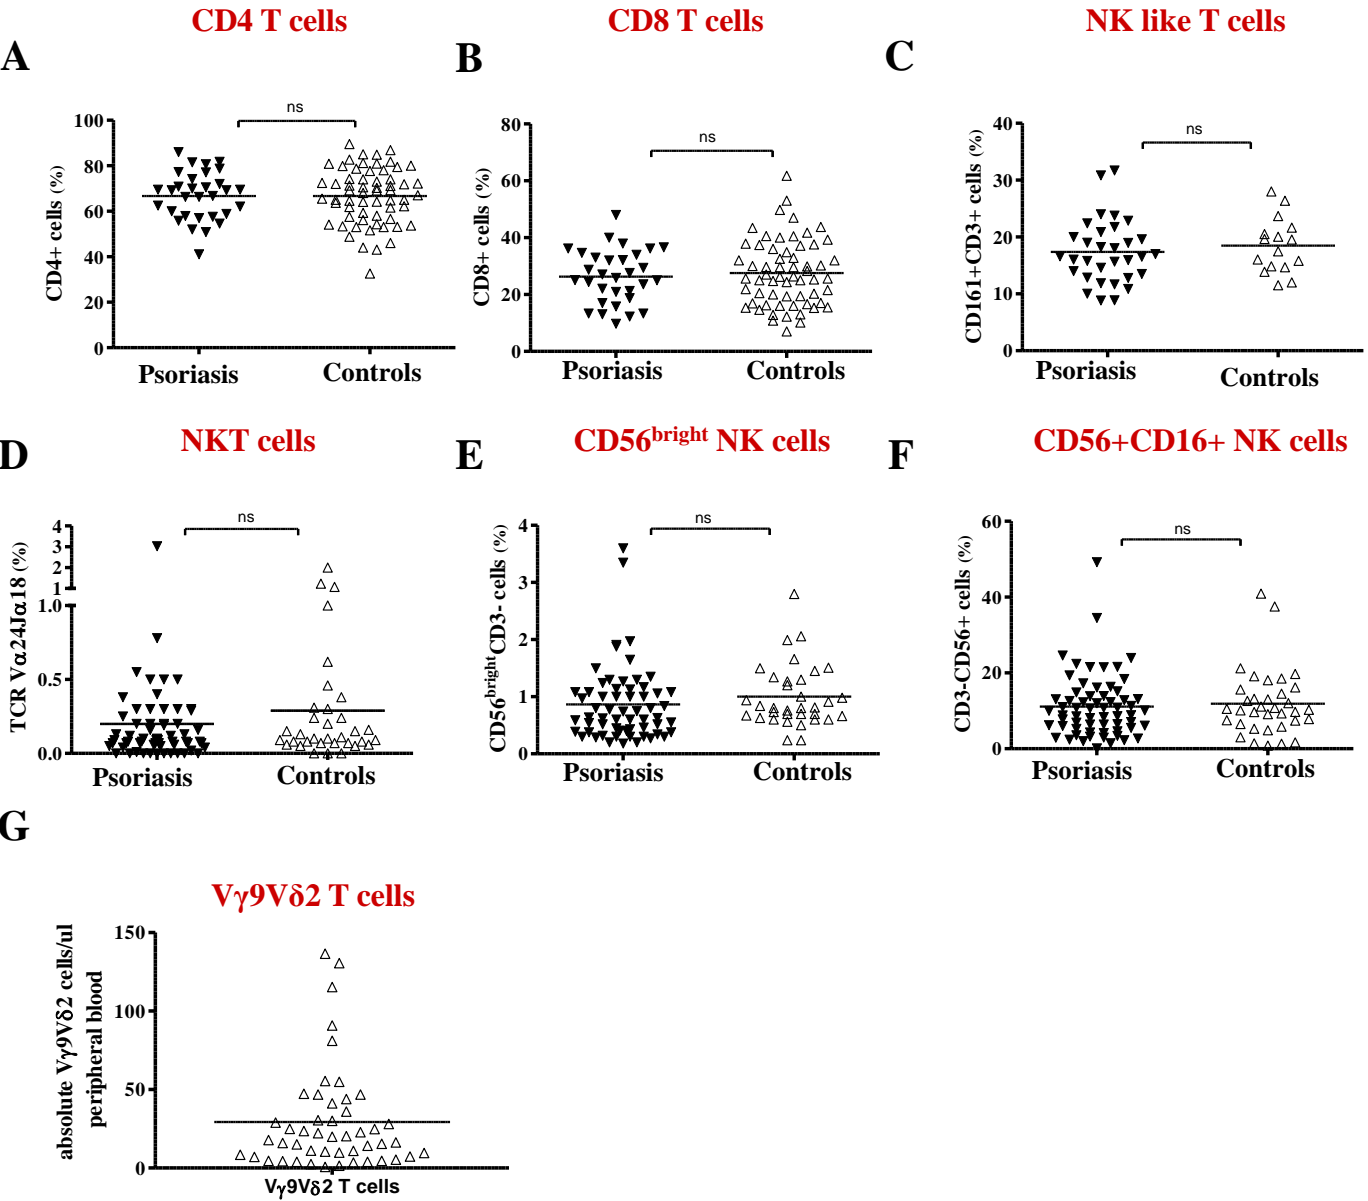

**Supplementary Figure 1. Adaptive and innate lymphocytes in psoriasis and healthy controls.** Percentage of circulating blood CD4+ T cells (CD3+CD4+) (A), CD8+ T cells (CD3+CD8+) (B), NK-like T cells (CD3+CD161+) (C) NKT cells (CD3+6B11+) (D), and NK cells (CD56<sup>bright</sup>CD3- (E) and CD56+CD16+CD3- (F)) was measured by flow cytometry, gated on CD3 (CD4, CD8, 6B11) and lymphocytes (NK cells, CD161+ T cells), respectively. Psoriasis patients and healthy controls did not show significant differences in any of the cell types analyzed. Psoriasis patients had a mean of 29 (+ 4.7) V $\gamma$ 9V $\delta$ 2 T cells /  $\mu$ l peripheral blood (G).

# Supplementary Figure 2

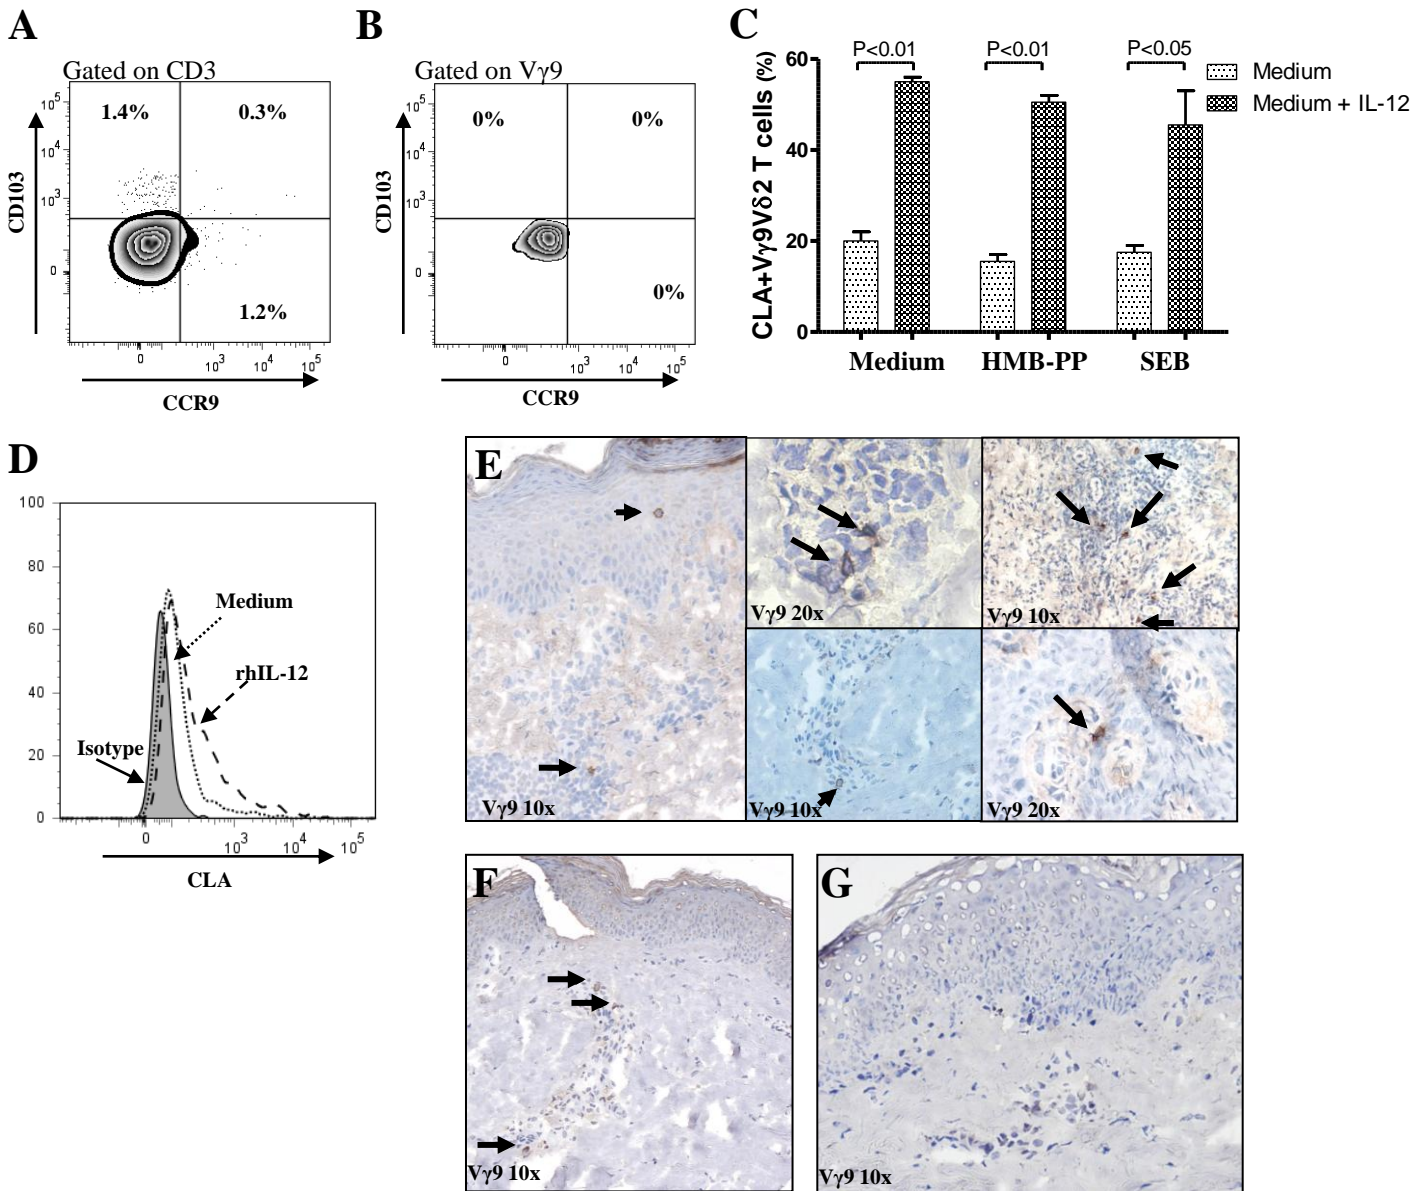

**Supplementary Figure 2. Peripheral V $\gamma$ 9V $\delta$ 2 T cells do not express gut homing markers, up-regulate CLA upon exposure to IL-12 and are present in psoriatic skin.** Expression of the gut homing markers CCR9 and CD103 ( $\alpha$ E $\beta$ 7 integrin) were analyzed on peripheral T cells of 5 healthy individuals by flow cytometry. While total CD3<sup>+</sup> T cells expressed low levels of CCR9 and CD103 (A), no circulating V $\gamma$ 9V $\delta$ 2 T cells with gut homing phenotype could be detected (B). To investigate CLA regulation peripheral V $\gamma$ 9V $\delta$ 2 T cell lines were either left unstimulated or stimulated with HMB-PP (1nM) or SEB (100ng/ml) for 3 days (all with and without IL-12). IL-12 induced a more than two fold up-regulation of CLA in all conditions independent of activation while activation by itself did not induce CLA (one representative experiment (n=3), done in triplicates) (C). To verify the exposure to IL-12 on CLA expression we analysed V $\gamma$ 9V $\delta$ 2 T cells by flow cytometry using fresh PBMCs. Fresh PBMCs were cultured for 3 days with 10 ng/ml IL-12 or with medium alone before staining for flow cytometry. IL-12 induced a distinct up-regulation of CLA on fresh V $\gamma$ 9V $\delta$ 2 T cells (one representative experiment, n=4) (D). 5  $\mu$ m sections of frozen healthy and psoriatic lesional and non-lesional skin were stained for the V $\gamma$ 9 antigen by immunohistochemistry. The arrows indicate V $\gamma$ 9 expressing cells. V $\gamma$ 9<sup>+</sup> cells were present in dermis and epidermis of psoriasis skin (E). In addition they were detected in non-lesional skin of psoriasis patients (F). V $\gamma$ 9<sup>+</sup> cells were rarely seen in healthy skin (G).

# Supplementary Figure 3

**A**

**V $\gamma$ 9V $\delta$ 2 cells counts in psoriatic skin (A)**

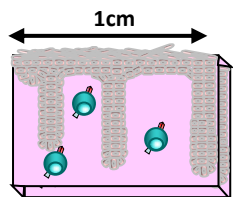

5µm thick section

**37.5 V $\gamma$ 9V $\delta$ 2 T cells in 1 cm skin section**

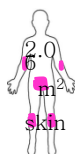

**2000 5 µm-thick sections correspond to 1 cm<sup>2</sup> of skin**

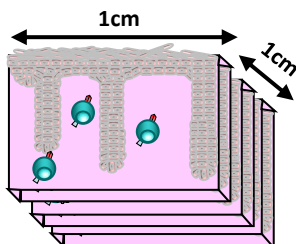

**37.5 x 2000 = 75 000 V $\gamma$ 9V $\delta$ 2 T cells estimated in 1 cm<sup>2</sup> of skin**

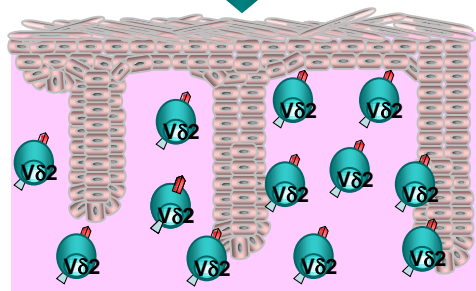

**A patient with 50% of body surface area affected (= 10300 cm<sup>2</sup> of skin) has 75,000 cells/cm<sup>2</sup> skin x 10300 cm<sup>2</sup>= **7.7 X10<sup>8</sup> V $\gamma$ 9V $\delta$ 2 T cells in affected psoriatic skin****

**V $\gamma$ 9V $\delta$ 2 cells counts in psoriatic blood (A)**

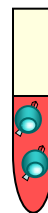

**9.8 V $\gamma$ 9V $\delta$ 2 T cells in 1 µl peripheral blood**

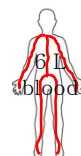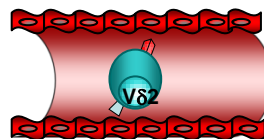

**9.8 V $\gamma$ 9V $\delta$ 2 T cells x 5.4 L blood = **0.53x10<sup>8</sup> V $\gamma$ 9V $\delta$ 2 T cells in peripheral blood****

**14 times more V $\gamma$ 9V $\delta$ 2 cells in psoriatic skin than in peripheral blood**

**B**

|                  | PASI score | psoriatic skin        |            |                                           | peripheral blood              |                                          | Fold increase in skin |
|------------------|------------|-----------------------|------------|-------------------------------------------|-------------------------------|------------------------------------------|-----------------------|
|                  |            | cells/cm <sup>2</sup> | % affected | absolute numbers V $\gamma$ 9V $\delta$ 2 | % of V $\gamma$ 9V $\delta$ 2 | absolute number V $\gamma$ 9V $\delta$ 2 |                       |
| <b>Patient A</b> | 25         | 7.5x10 <sup>4</sup>   | 50%        | 7.73x10 <sup>8</sup>                      | 2.4%                          | 5.3x10 <sup>7</sup>                      | <b>14</b>             |
| <b>Patient B</b> | 24.1       | 8.8x10 <sup>4</sup>   | 49%        | 8.66x10 <sup>8</sup>                      | 1.6%                          | 3.4x10 <sup>7</sup>                      | <b>25</b>             |

**Supplementary Figure 3. Calculation of absolute numbers of V $\gamma$ 9V $\delta$ 2 T cells in total psoriatic skin.** V $\gamma$ 9V $\delta$ 2 T cells in blood and psoriatic skin of one patient (Patient A) were estimated. In his lesional psoriatic skin, 6 V $\delta$ 2 expressing T cells were detected in 1.6 mm of a 5  $\mu$ m section corresponding to 37.5 cells in 1 cm of 5  $\mu$ m thick skin. A 1 cm<sup>2</sup> area of skin is equivalent to  $2 \times 10^3$  0.5  $\mu$ m-thick sections, therefore we multiplied 37.5 by  $2 \times 10^3$ . This resulted in  $7.5 \times 10^4$  V $\gamma$ 9V $\delta$ 2 T cells / 1 cm<sup>2</sup> of psoriatic skin. Clinical examination revealed that 50% of the body surface area were covered by psoriasis plaques. Patient A had – as calculated from his body size (178 cm) and weight (86 kilos) - a total body surface area of 2.06 cm<sup>2</sup>, 50% of which corresponds to 10300 cm<sup>2</sup> of psoriatic skin. We calculated V $\gamma$ 9V $\delta$ 2 T cell numbers in this patient's affected skin by multiplying V $\gamma$ 9V $\delta$ 2 T cell number in 1 cm<sup>2</sup> by the affected skin surface area resulting in an approximate number of  $7.7 \times 10^8$  V $\gamma$ 9V $\delta$ 2 T cells (**STD:  $+1.3 \times 10^8$** ). To put this number into context we calculated the approximate number of V $\gamma$ 9V $\delta$ 2 T cells in his peripheral blood. A differential blood count and flow cytometry for V $\gamma$ 9V $\delta$ 2 T cells in peripheral blood taken at the same time as the biopsy was used to deduct absolute T cell numbers in peripheral blood resulted in an absolute number of 9.8 V $\gamma$ 9V $\delta$ 2 T cells in 1  $\mu$ l of peripheral blood. The total blood volume of this patient was calculated to be 5.44 l, resulting in an approximate total of  $0.53 \times 10^8$  V $\gamma$ 9V $\delta$ 2 T cells in his circulation. Remarkably at the time of biopsy, Patient A had more than 14 times higher numbers of V $\gamma$ 9V $\delta$ 2 T cells in his psoriatic skin than in his peripheral blood (**A**). The calculation for Patient A is summarized in (**B**). We could confirm these data in a further patient (Patient B) with a PASI of 24.1 with an 25 fold increase of V $\gamma$ 9V $\delta$ 2 T cells in his psoriatic skin compared to peripheral blood ( **$8.66 \times 10^8$  ( $\pm$  STD  $1.5 \times 10^8$ ) in skin,  $3.4 \times 10^7$  in peripheral blood**) (**B**).

# Supplementary Figure 4

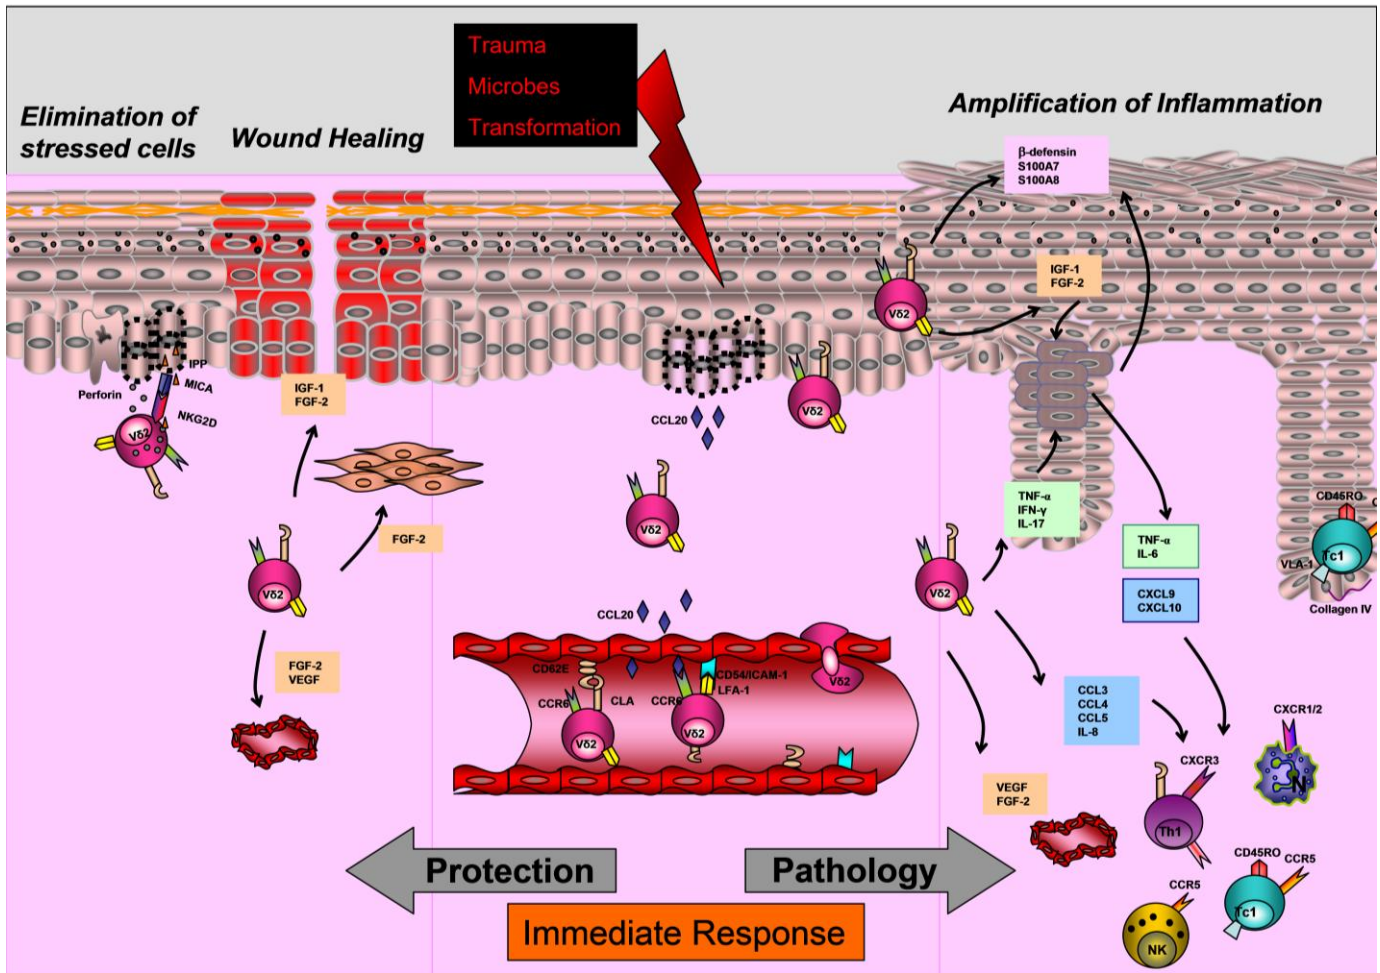

**Supplementary Figure 4. The potential role of  $V\gamma 9V\delta 2$  T cells in skin immunology.** We propose that  $V\gamma 9V\delta 2$  T cells are immediate response tissue surveillance cells that can have both, protective and pathogenic roles.  $V\gamma 9V\delta 2$  T cells are attracted to perturbed skin via CCL20 released by keratinocytes and produce growth factors such as IGF-1, FGF-2 and VEGF important for wound healing and angiogenesis. In addition  $V\gamma 9V\delta 2$  T cells are possibly involved in tumour immunosurveillance through their recognition of stress-upregulated self antigens such as IPP and MICA/B.

However,  $V\gamma 9V\delta 2$  T cells could be pathogenic in psoriasis where they might initiate and amplify the inflammatory loop by producing psoriasis-relevant cytokines (IL-17, IFN- $\gamma$  and TNF- $\alpha$ ) and chemokines (CCL3, CCL4, CCL5 and IL-8), thus attracting a plethora of immune cells to the evolving psoriatic lesions. Finally, they produce growth factors (IGF-1, FGF-2, VEGF) and antimicrobial peptides (S100A7, S100A8,  $\beta$ -defensin-2) also playing a role in psoriasis pathogenesis.
