# Supplementary material
Source: PubMed Central journal article supplement (PMC3187621)
Supplement: NIHMS36571-supplement-2.pdf [file NIHMS36571-supplement-2.pdf]

## Figure for Reviewers 1

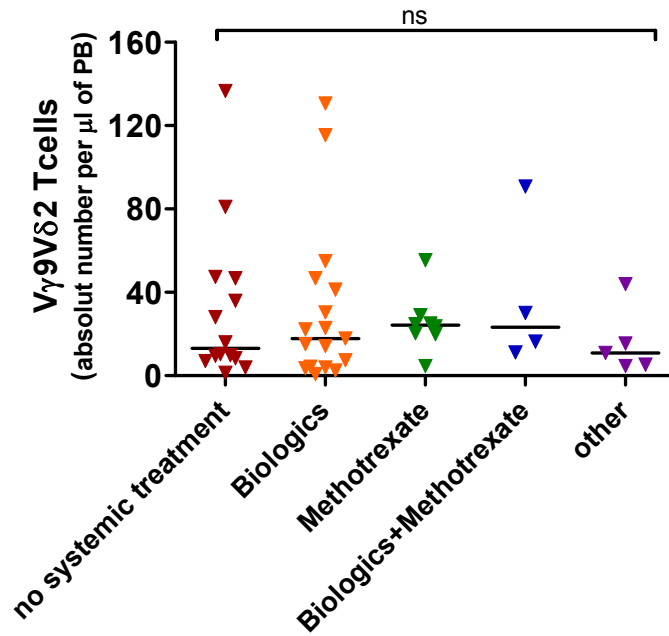

### Figure Legend 1. Influence of therapy on absolute numbers of Vγ9Vδ2 T cells.

Absolute numbers of peripheral Vγ9Vδ2 T cells could be retrieved from 48 out of 66 patients, with a mean of  $29 (\pm 4.7)$  Vγ9Vδ2 T cells/ml of blood (not shown). Therapy did not have a significant effect on absolute peripheral Vγ9Vδ2 T cell numbers compared to the untreated patient cohort.

## Figure for Reviewers 2

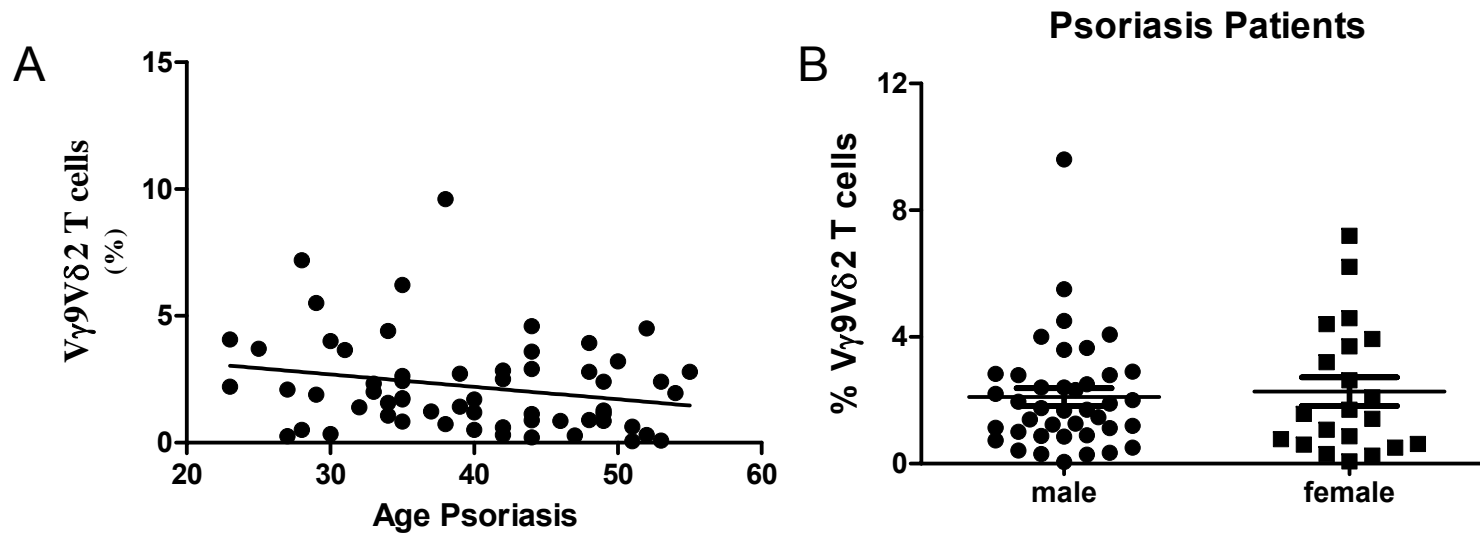

**Figure Legend 2. Correlation of percentage of Vγ9Vδ2 T cells in psoriasis patients with their age and gender.**

There was no significant correlation between percentage of Vγ9Vδ2 T cells in peripheral blood of psoriasis with the age of the patients (**A**). In addition, there was no significant difference between percentage of Vγ9Vδ2 T cells in males and female psoriasis patients (**B**).

## Figure for Reviewers 3

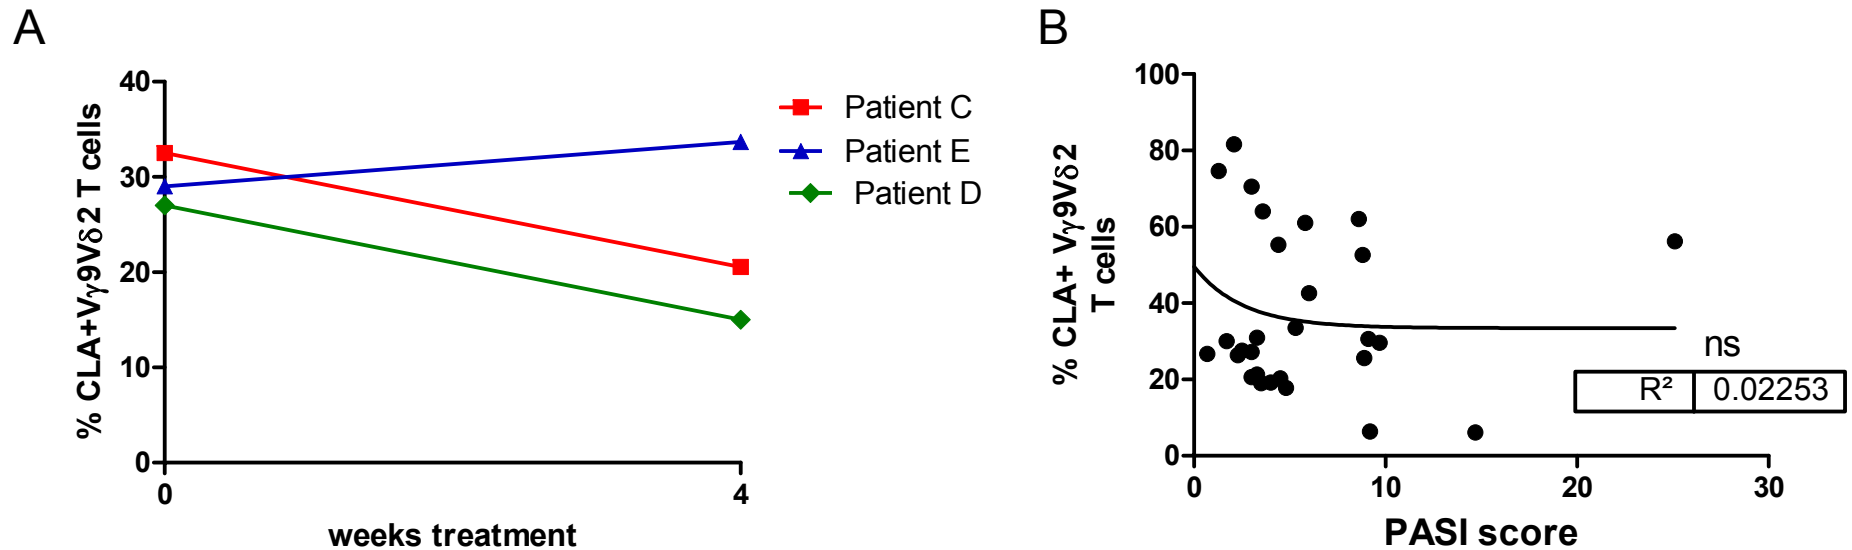

**Figure Legend 3. Influence of successful therapy on percentage of CLA+ V $\gamma$ 9V $\delta$ 2 T cells in psoriasis.** Percentage of CLA+ V $\gamma$ 9V $\delta$ 2 T cells analysed before treatment and 4 weeks into successful treatment did not show a significant change (**A**). In addition, percentage of CLA+ V $\gamma$ 9V $\delta$ 2 T cells did not correlate with disease severity measured as PASI score (**B**).
